## 1 Title

- 2 • Decoding imaginary handwriting trajectories of multi-stroke characters for universal
- 3 brain-to-text translation
- 4 • Handwriting trajectory decoding for BCI

## 5 Authors

6 Yaoyao Hao,<sup>1,2,3\*</sup> Guangxiang Xu,<sup>1,4,6</sup> Xiaomeng Yang,<sup>1,3,6</sup> Zebin Wang,<sup>1,4,6</sup> Xinzhu

7 Xiong,<sup>1,3,6</sup> Kedi Xu,<sup>2,6</sup> Junming Zhu,<sup>5</sup> Jianmin Zhang,<sup>5</sup> Yueming Wang<sup>2,6,7\*</sup>

## 8 Affiliations

9 <sup>1</sup> The State Key Lab of Brain-Machine Intelligence, Zhejiang University, Hangzhou,

10 China

11 <sup>2</sup> Nanhu Brain-computer Interface Institute, Hangzhou, China

12 <sup>3</sup> Department of Computer Science and Technology, Zhejiang University, Hangzhou,

13 China

14 <sup>4</sup> Department of Biomedical Engineering, Zhejiang University, Hangzhou, China

15 <sup>5</sup> Department of Neurosurgery, Zhejiang University School of Medicine Second Affiliated

16 Hospital, Hangzhou, China

17 <sup>6</sup> Qiushi Academy for Advanced Studies, Zhejiang University, Hangzhou, China

18 <sup>7</sup> MOE Frontier Science Center for Brain Science and Brain-Machine Integration,

19 Zhejiang University, Hangzhou, China

20 \* Corresponding author: Yaoyao Hao (yaoyaoh@zju.edu.cn) and Yueming Wang

21 (ymingwang@zju.edu.cn)

## 22 Abstract

23 The potential of decoding handwriting trajectories from brain signals for use in brain-to-

24 text communication has yet to be fully explored. Here, we developed a novel brain-

25 computer interface (BCI) paradigm that tried to fit the trajectories of imaginary

26 handwriting movements from intracortical motor neural activities and translate them into

27 texts using machine learning approach. The trajectories for handwriting of digits and

28 multi-stroke characters were decoded using a diverse array of neural signals, achieving an

29 average correlation coefficient of 0.75. We developed a speed profile identifier based

30 handwriting recognition algorithm, which accomplished a recognition rate of around 80%

31 within an extensive database of 1000 characters. Additionally, our research uncovered a

32 notable distinction in the neuronal direction tuning between writing strokes and cohesions

33 (air connections between strokes), leveraging which a dual-model approach could exploit

34 to enhance performance by up to 11.7%. Collectively, these findings demonstrated a new

35 approach for BCIs that could possibly implement a universal brain-to-text communication

36 system for any written languages.

## 37 Teaser

38 Handwriting trajectory was successfully decoded from brain signal for direct brain-to-text

39 translation of any written languages.

40

41

## 42 MAIN TEXT

### 43 44 Introduction

45 Over the past two decades, intracortical brain-computer interfaces (BCIs) have emerged as  
46 revolutionary tools that enable direct communication between the human brain and  
47 external devices (1-5). Initially conceptualized for assisting individuals with severe motor  
48 impairments, BCIs have since expanded into various applications, ranging from restoring  
49 speech (6, 7) to walk (8). By translating motor-related neural signals into actionable  
50 commands, either by classification or trajectory fitting, BCIs have opened new avenues  
51 for individuals to interact with their environment, offering a means to overcome physical  
52 limitations and engage with technology in unprecedented ways (9).

53 The introduction of Handwriting paradigm into BCIs represents a significant leap  
54 forward in the field, allowing users to convert imagined handwriting movements—a more  
55 natural mode of expression—into textual output. A seminal work in this domain is done  
56 by Willett et al. (10), which demonstrated the feasibility of translating neural activity into  
57 English letters then into text. A recurrent neural network was trained to convert the neural  
58 activity into letter probabilities, which were then thresholded to emit discrete characters  
59 for real-time decoding. Remarkably, the participant achieved typing speeds of 90  
60 characters per minute with an impressive 94.1% raw classification accuracy within a 30-  
61 character scope. The system demonstrated the potential of BCIs to facilitate complex,  
62 intuitive interactions that closely resemble the fluidity and nuance of human writing.  
63 Building on this progress, more recent studies have explored the classification of  
64 handwritten characters using neural activity recorded from scalp-based electrodes (11, 12).

65 Despite these advancements, the current state of handwriting BCIs presents several  
66 challenges and limitations. A principal concern is that the classification-based decoding  
67 scheme utilized in previous studies is tailored for Latin-based languages, which require the  
68 discrimination of only a few dozen letters to construct text. In contrast, non-Latin  
69 languages, such as Chinese, demand the classification of thousands of distinct characters,  
70 a task that is currently beyond the scope of neural signal-based classification for BCIs.  
71 Moreover, while neuroimaging and lesion studies have successfully identified the brain  
72 regions associated with handwriting (13, 14), the underlying neural mechanisms of the  
73 handwriting process remain poorly understood. This gap in knowledge may impede the  
74 advancement and broader application of handwriting BCIs, as it limits the ability to refine  
75 algorithms and develop systems that can effectively interpret the complex neural activity  
76 associated with writing movements across strokes.

77 Here, we present a novel paradigm for BCI that shifts the focus from classifying  
78 the identities to reconstructing the very trajectories of imagined handwriting, to realize a  
79 universal brain-to-text system by translating the trajectories into any forms of text.  
80 Concurrently, our approach allows for a detailed examination of neuronal tuning  
81 mechanisms for handwriting to facilitate the decoding of trajectories. We have achieved  
82 high-fidelity reconstruction of the trajectories and attained an approximate 80%  
83 recognition rate within a vast character database. These advancements hold profound  
84 implications for the field of assistive technology, offering a potential new avenue for  
85 communication and expression for broad population.

### 86 87 Results

88 We surgically implanted two Utah arrays into the left motor cortex of a patient,  
89 specifically targeting the region surrounding the hand 'knob' area, as depicted in the inset  
90 of Fig. 1A. The patient, a right-handed individual in his 70s, had experienced a C4-level  
91 spinal cord injury resulting in total sensory and motor loss below the shoulders. The

92 subject was instructed to attempt to handwrite characters with his right-hand using chalk  
93 on a blackboard, following a video displayed on a screen (as illustrated in Fig. 1A). The  
94 video presented handwriting sequences of strokes and cohesions—representing the air  
95 connections between strokes—of a single character at a consistent speed (Fig. 1B). Fig.  
96 1C illustrates the smoothed velocity profiles in the  $x$ - and  $y$ -direction during the writing of  
97 a character that comprised three strokes and two cohesions, with each stroke or cohesion  
98 exhibiting a bell-shaped velocity curve.

99 We recorded raw neural signals during the imagined handwriting process. From these  
100 signals, we extracted features from both low and high-frequency bands (as shown in Fig.  
101 1D), encompassing a range of measurements such as local field potential (LFP), single and  
102 multiple unit activity (SUA and MUA), entire spike activity (ESA), etc. (see Methods).  
103 Fig. S1 presents examples of SUA recorded across all 192 electrodes during a single  
104 session, providing a glimpse into the neural activity associated with the motor imagery of  
105 handwriting.

### 107 **Neuronal tuning during handwriting**

108 To examine the directional tuning properties of individual neurons, we initiated our  
109 investigation by requesting the subject to perform a center-out handwriting task, which  
110 involved tracing eight directional paths from the center and two circular paths both  
111 clockwise and counterclockwise. A raster plot of a well-isolated example neuron is  
112 displayed in Fig. 2A, from which, we inferred that the preferred direction (PD) of this  
113 neuron is predominantly downward and toward the lower right, as illustrated in Fig. 2B.  
114 Concurrently in the same session, the subject was also tasked with handwriting the digits  
115 from 0 to 9, and the resulting raster plot for the same neuron was presented in Fig. 2C.  
116 Upon plotting the spikes back onto the digit numbers as shown in Fig. 2D, it was observed  
117 that the majority of spikes occurred during the writing downward strokes (such as in digits  
118 of 0, 1, 7, etc.) or those inclined toward the lower right (such as in digits of 5 and 8). This  
119 is in well coincidence with the results obtained from the center-out task. We exhibited  
120 additional example neurons of one session in Fig. S2A, which displayed a variety of  
121 tuning directions and profiles. The spike-on-digit plots in Figures S2B and S2C depicted  
122 the firing patterns of another two example neurons from Fig. S2A with preferred  
123 directions of leftward and upward, respectively. Once again, the directional tuning  
124 observed between the center-out task and the digit-handwriting task was found to be  
125 highly congruent.

126 In order to assess the impact of visual stimuli on neural activity, we conducted  
127 handwriting tasks both with and without video guidance within the same session. Several  
128 example neurons under both conditions are showcased in Fig. S3, where it is evident that  
129 the neural activity in the absence of video guidance maintained clear distinguishability  
130 among different digits. Most importantly, it retained a significant resemblance to its  
131 counterpart with video guidance. However, due to the issue of alignment, the initiation  
132 and termination points of each handwriting strokes or cohesions could not be accurately  
133 identified, thereby hindering more detailed subsequent analysis.

134 To scrutinize the population activity patterns, we utilized principal component  
135 analysis (PCA) to diminish the dimensionality of neural activity data, followed by  
136 visualization using t-distributed stochastic neighbor embedding (tSNE) as presented in  
137 Fig. 2E. The neural activities corresponding to different digits were well-separated; digits  
138 with similar writing styles, like 6 and 0, 4 and 9, etc., were found in close proximity to one  
139 another, suggesting analogous population dynamics. A simple classifier (support vector  
140 machine, SVM) with bin size of 200 ms achieved an average accuracy of  $96.7\% \pm 2.21\%$ ,  
141 as depicted in Fig. 2F. Furthermore, we engaged an artificial neural network in an attempt

142 to model and fit the trajectory of digit writing based on the population neural activities.  
143 The outcomes demonstrated human-recognizable reconstructions on a single-trial basis, as  
144 portrayed in Fig. 2G. These findings suggest that the neural representation of imagined  
145 handwriting is distinct and likely supports the decoding of more intricate handwriting  
146 patterns, such as Chinese characters.

### 147 **Trajectory fitting of handwriting Chinese characters**

148 To test if the neural activity during imaginary handwriting could be used to fit more  
149 complex trajectories, we asked the subject to write 180 Chinese characters in 6 sessions.  
150 These characters, illustrated in Fig. S4A, are commonly used in daily life. Meanwhile,  
151 these characters are complex, with an average of  $7.06 \pm 2.78$  strokes per character. First of  
152 all, the neural activity patterns for each character were highly distinct; SVM classifier  
153 based on SUA and MUA achieved nearly perfect discrimination ( $98.2\% \pm 2.29\%$  and  
154  $97.2\% \pm 2.30\%$ ) among 30-character in each session (Fig. 3B).

155 Next, we tried to fit the neural activities into the velocity of the handwriting, and  
156 reconstruct the trajectory by performing an integration along the path, as depicted in  
157 Figure 3C. We trained both linear Kalman filter and nonlinear long short-term memory  
158 (LSTM) network using leave-one-character-out cross-validation for trajectory fitting. The  
159 decoding correlation coefficient (CC) and mean square error (MSE) with various types of  
160 low- and high-frequency signals were presented in Fig. 3D and S4C, respectively. Across  
161 all scenarios, the LSTM demonstrated superior fitting outcomes compared to the Kalman  
162 filter. Notably, ESA yielded significantly better results than all other signal types, with an  
163 average CC of  $0.753 \pm 0.18$ .

164 We further investigated the optimization of parameters for ESA extraction, as shown  
165 in Figures S4E-4H, and discovered that the outcomes were not particularly sensitive to  
166 parameter variations within a specific range. Finally, a bidirectional LSTM (bi-LSTM)  
167 yielded even more improved decoding results (Fig. S4I), but the decoding was not causal  
168 and thus unsuitable for online use. Additionally, the computational load was much higher  
169 than that of a standard LSTM.

170 To provide a qualitative illustration of how the reconstructed trajectories varied with  
171 different CC values, we showcased five example reconstructions in Figure 3E, with CC  
172 values ranging from 0.1 to 0.9. Generally, a reconstruction with a CC exceeding 0.5 would  
173 result in a human recognizable shape. Further quantitative results are detailed below.  
174

### 175 **Stroke and cohesion decoding during handwriting**

176 The act of handwriting characters, whether they are Latin or Non-Latin words, is  
177 composed of strokes and cohesions, which possess distinct movement features and are  
178 likely encoded differently at the neural level. Upon close examination of the trajectory  
179 fitting outcomes for more rudimentary characters, it became evident that the decoding  
180 accuracy for individual strokes consistently surpassed that of cohesions. As illustrated in  
181 Fig. 4A, the four representative characters highlighted that incorrect cohesion decoding—  
182 primarily concerning the orientation of each cohesion—resulted in the misplacement of  
183 well-decoded strokes. This misplacement led to dissimilar profiles and, consequently,  
184 trajectories that were unrecognizable.

185 We then conducted a detailed examination of the neuronal tuning for strokes and  
186 cohesions in isolation. Fig. 4B showcased the tuning curve of one example neuron. For  
187 strokes, the curve peaked at a preferred writing direction of  $135^\circ$ , yet remained flat for  
188 cohesions across all directions. When combined, the tuning curve was biased toward  
189 strokes due to their predominance. For comparative purposes, we also assessed the  
190 neuronal tuning of strokes that were randomly divided in half. As depicted in Fig. 4C, the  
191

192 same example neuron from Fig. 4B exhibited consistent tuning properties between the two  
193 stroke groups. Additional example tuning curves contrasting strokes versus cohesions are  
194 displayed in Fig. S5A, with comparisons to tuning curves of stroke halves in Fig. S5B. We  
195 quantified the differences by calculating the delta PD and CC between the two tuning  
196 curves (Fig. 4D). The results demonstrated a significantly higher delta PD (39.1 vs. 91.4,  $p$   
197 = 6.93e-8) and lower CC (0.03 vs. 0.65,  $p$  = 8.87e-14) for stroke vs. cohesion compared to  
198 stroke vs. stroke, indicating markedly different tuning property between strokes and  
199 cohesions.

200 Subsequently, we developed two decoding models, one trained exclusively with  
201 stroke data and the other with cohesion data, to evaluate whether this dual-model approach  
202 would outperform the single model trained with a mix of strokes and cohesions. The  
203 strokes and cohesions of the same four example characters were decoded using their  
204 respective models (Fig. 4E), showing improved fitting quality for both strokes and  
205 cohesions over the single-model depicted in Fig. 4A. It is important to note that the more  
206 precise orientation decoding for cohesions facilitated the correct placement of strokes,  
207 which is essential for character recognition. Quantitative results from a dataset of 30  
208 characters (Fig. 4F) revealed significantly improved decoding similarity for both  
209 cohesions (0.79 vs. 0.87,  $p$  = 4e-07) and strokes (0.76 vs. 0.87,  $p$  = 2.3e-22).

210 Encouraged by these findings, we applied the dual-model scheme to the 180-  
211 character dataset and demonstrated that the dual-model achieved a significantly lower  
212 MSE (99.0±56.9 vs. 67.4±41.2) and higher CC (0.753±0.18 vs. 0.841±0.11) for overall  
213 trajectory fitting than the single model, as depicted in Fig. 4G, which was around 11.7%  
214 improvement. However, for practical application of this dual-model approach, it was  
215 necessary to first distinguish whether a particular part was a stroke or a cohesion. We then  
216 employed a LSTM classifier to classify strokes and cohesions bin-by-bin using ESA, SUA  
217 and local motion potential (LMP) signals. The ESA achieved highest classification  
218 accuracy of 83.72%±5.83%, indicating a promising discriminatory capability (Fig. 4H).

219 We then constructed a decoding model by cascading the stroke/cohesion classifier  
220 and dual-model fitting decoder. That is, for each bin, the classifier first determined  
221 whether the current bin corresponded to a stroke or a cohesion, followed by velocity  
222 fitting using the appropriate model accordingly. However, this cascading model did not  
223 outperform the single model in terms of either CC or MSE, as shown in Figure 4I.  
224 Although we demonstrated that the encoding structures for strokes and cohesions were  
225 distinct during handwriting, the decoding method by combining two stages of  
226 classification and fitting did not enhance the trajectory reconstruction. Further study could  
227 be done to explore more sophisticated algorithms, but single LSTM model is strong  
228 enough for current study. Consequently, we continued to utilize a single LSTM model  
229 with ESA signal for trajectory fitting in subsequent analyses.

### 231 **Translate decoded trajectories into text**

232 To objectively assess whether the decoded trajectories could be recognized as legible text,  
233 we initially utilized a generic handwriting recognition software to discern the continuous  
234 trajectory for each character. In this scenario, we used ESA, SUA and LMP for decoding  
235 and compared both speed and position decoding schemes. ESA velocity decoding yielded  
236 the highest recognition rate; however, only around a quarter (27.6%) of the trajectories  
237 could be recognized as correct Chinese characters (Fig. 5A). This was not surprise because  
238 the trajectory for each character was essentially a single continuous stroke, which  
239 significantly deviates from conventional stroke-by-stroke handwriting patterns (see  
240 Discussion section).

241 To recognize the trajectories correctly, we devised an innovative method aimed at  
242 finding out standard character that has the most similar speed profile with the decoded  
243 trajectories. The underlying concept was that each character would generate a unique and  
244 distinctive speed profile identifier along the writing process. To that end, we first built a  
245 library that encompassed the speed profiles for writing the standard 180-character. Then  
246 each decoded trajectory was z-score normalized and matched with the most similar  
247 standard character using dynamic time warping (DTW) algorithm. Once again, ESA with  
248 velocity decoding achieved the highest recognition rate, and this time approximately  
249 87.2% of the trajectories could be correctly recognized (Fig. 5B). Given that the speed  
250 profiles were highly unique for each character, only a slight decrease in recognition rate to  
251 79.8% was observed when the library expanded to 1000 characters (Fig.5C). Comparing  
252 to CC based method, DTW permits temporal sequences to exhibit certain degrees of delay  
253 or stretching along the time axis, thereby enabling a more precise capture of the inter-  
254 sequence similarity. This suggested that the recognition method was sufficiently robust for  
255 recognizing a large number of characters.

256 Ultimately, we examined the consistency of decoded trajectories for the same  
257 character across different days. The same set of 30 characters was repeatedly written four  
258 times over the course of eight days. Despite variations in neural activity, the decoded  
259 trajectories maintained a high degree of similarity; even after intervals of up to eight-day,  
260 all cross-day correlation coefficients exceeded a high value of 0.84 (Fig. 5D). This  
261 indicated that the imaged handwriting trajectory could possess certain stability, which  
262 could further improve the recognition rate (e.g., using the trajectory that decoded in  
263 previous days as the template). Collectively, these findings suggest that the trajectories of  
264 complex characters can be decoded and recognized as text, offering a universal brain-to-  
265 text communication solution applicable to any written language.

## 266 Discussion

268 In this study, we recorded intracortical neural activity from a human patient during video-  
269 guided imagined handwriting. Our findings revealed that neurons exhibit tuning properties  
270 during the handwriting process akin to the classical motor directional tuning theory (15).  
271 Additionally, we discovered that writing strokes and cohesions are encoded with distinct  
272 rules. Leveraging these insights, we engineered decoders capable of accurately  
273 reconstructing the trajectories of imagined handwriting for complex Chinese characters.  
274 Moreover, we developed a novel matching algorithm that translates these trajectories into  
275 legible text. This approach contrasts with previous classification methods (10) which  
276 introduced a pioneering brain-to-text methodology that were suitable for letter-based  
277 languages. Specifically, our method involves reconstructing handwriting trajectories and  
278 subsequently recognizing these trajectories as text, a technique that holds promise for  
279 application across universal languages. This innovative strategy advances the field of  
280 BCIs and paves the way for individuals with limited mobility to communicate through  
281 written language.

282 Movement trajectory fitting is a well-established technique within the realm of BCIs.  
283 Prior research has predominantly concentrated on decoding straight movements in arm-  
284 reach distances with both monkeys and humans, demonstrating control capabilities for  
285 computer cursors (3, 16) or prosthetics (2, 17). Preliminary trials have also explored the  
286 decoding of simple curved drawings in monkeys (18, 19). However, the ability to  
287 reconstruct the intricate handwriting trajectory, which occurs within a significantly smaller  
288 range but encompasses complex spatial and temporal dynamics, remained unexplored.  
289 Willett et al. provided an illustration of trial-averaged activity to reconstruct the trajectory  
290 of handwriting of single letters (10). Our study first confirms that incorporating temporal

291 variability induced by handwriting significantly enhances classification accuracy (10), as  
292 evidenced by the perfect discrimination of up to 30 characters. More notably, due to the  
293 precise alignment between neural activity and handwriting kinematics, we have been able  
294 to reconstruct complex writing trajectories as human recognizable characters on a single-  
295 trial basis. To the best of our knowledge, this research marks the inaugural attempt to  
296 reconstruct complex handwriting movements for brain-to-text communication. This novel  
297 strategy extends the application of handwriting BCIs to encompass any written language,  
298 be it Latin-based or non-Latin, as it enables the decoding of any written trajectory as it is,  
299 thereby broadening the horizons for individuals seeking enhanced communication  
300 capabilities.

301 Handwriting serves as a pivotal motor task for investigating motor control (20) and  
302 assessing motor diseases (21). However, previous studies have predominantly focused on  
303 the analysis of written trajectories, often overlooking the distinct characteristics of strokes  
304 and cohesions. In reality, the execution of strokes and cohesions in handwriting exhibits  
305 fundamental differences, both from kinematic perspectives—such as cohesions involving  
306 an additional movement dimension perpendicular to the paper plane—and kinetic  
307 aspects—like the significantly reduced force applied to the pen during cohesions  
308 compared to strokes. While the neural substrates and mechanisms of handwriting have  
309 been primarily examined through lesion studies and neuroimaging (13, 14), our research  
310 delves into the single-neuron level investigation of both stroke and cohesion handwriting.  
311 We discovered markedly different tuning properties between the two at the individual  
312 neuron level, a finding underscored by the superior performance of a dual-model approach  
313 over a single mixed model when the labels for strokes and cohesions were identifiable.  
314 Nevertheless, our attempt to integrate a classification model with trajectory fitting did not  
315 surpass the performance of the single model. This was primarily attributed to the  
316 inappropriate assign of strokes and cohesions, despite achieving a bin-by-bin classification  
317 accuracy exceeding 85%. Further exploration into the population neural dynamics (22)  
318 may yield more effective discrimination between strokes and cohesions, thereby  
319 facilitating more precise trajectory fitting and enhancing our understanding of the intricate  
320 processes underlying handwriting.

321 Handwriting recognition and Optical Character Recognition (OCR) have reached a  
322 high level of sophistication and are widely utilized in contemporary applications (23, 24).  
323 However, these standard recognition techniques are not well-suited for the handwriting  
324 trajectories reconstructed from neural signals in our study, primarily for two reasons.  
325 Firstly, generic handwriting recognition systems are trained on normal handwriting  
326 patterns, which are notably distinct from the continuous one-touch-writing trajectories we  
327 decoded here. Secondly, the single-model decoding approach used in our study, was prone  
328 to inaccuracies particularly for cohesions, which led to the misplacement of otherwise  
329 correctly decoded strokes. Therefore, a recognition program tailored to account for these  
330 specific characteristics would likely achieve a higher recognition rate. In addition, one  
331 interesting finding was that the reconstructed trajectories of the same character exhibited a  
332 high degree of similarity across different days, indicating a consistent, person-specific  
333 signature would exist. To account for that, a personalized recognition program could be  
334 more effective in accurately decoding imagined handwriting. The consistency of these  
335 trajectories over time underscores the potential for developing individualized algorithms  
336 that can reliably interpret the unique handwriting patterns derived from neural activity.

337 Our study, while illuminating, has several limitations that warrant acknowledgment.  
338 Firstly, although visual guidance was instrumental in synchronizing neural activities with  
339 handwriting kinematics, it also risked contaminating or even amplifying the handwriting-  
340 related signals, potentially leading to false positive detections. Nonetheless, this approach

341 remains a valuable starting point for constructing an initial decoder, which can be further  
342 refined during online testing as reliance on visual cues diminishes. Another limitation is  
343 that our study still considered handwriting as a 2D plane movement, rather than  
344 employing a 3D or multi-dimensional model. Future research should integrate these  
345 additional dimensions to more fully account for the variations observed in neural data,  
346 particularly for the nuanced differences between strokes and cohesions.

347 The application of our findings in the near future seems highly plausible, especially  
348 considering that fully implantable electronics are now accessible in both academic (25)  
349 and industrial (26) spheres. This advancement will expedite the translation of our research  
350 into practical human applications, broadening the potential impact of our work in the field  
351 of BCIs and motor control studies.

## 353 **Materials and Methods**

### 354 *Participant and surgery*

355 The participant enrolled in this study was a right-handed individual, who had experienced a C4-level  
356 spinal cord injury and resulted in total sensory and motor loss below the shoulders. The microelectrode  
357 implantation surgery was conducted about 3 years after the injury in his 70s and data collection for this  
358 study was at around 2.5 years after the surgery. All clinical and experimental procedures received approval  
359 from the Medical Ethics Committee of the Second Affiliated Hospital of Zhejiang University and were  
360 registered in the Chinese Clinical Trial Registry ([chictr.org.cn](http://chictr.org.cn); registration number: ChiCTR2100050705).

361 Two 96-channel Utah microelectrode arrays (Blackrock Microsystem, USA) were implanted into the  
362 left precentral gyrus, specifically targeting the hand 'knob' area of motor cortex (Fig. 1A inset). The location  
363 of implantation was identified using functional magnetic resonant imaging (fMRI) prior to surgery when the  
364 participant imaging reaching and grasping movement.

### 366 *Video-guided handwriting paradigm*

367 To guide the motor imaginary process for the patient, a handwriting video was played on the computer  
368 monitor. The video consisted of stroke-by-stroke writing animation of a specific character, leading by a hand  
369 with chalk (Fig. 1A). The patient was asked to attempt to write the same character with chalk on a  
370 blackboard following the guidance. We also asked the patient to write on a paper with pen, basically the  
371 classification results were similar. We kept using chalk on blackboard paradigm based on the patient's  
372 preference. A typical trial started by showing the character (in dark green) on the screen (500 ms) followed  
373 by an auditory prompt of the character's pronunciation (1000 ms). After a short delay (300 ms), a sound cue  
374 was issued and the writing animation started. The writing consisted of both strokes and cohesions, i.e., air  
375 connection between strokes. The written strokes were highlighted as light green and the cohesions were  
376 simplified as a direct line between the end of current stroke and the start of next stroke. The duration of  
377 writing depended on the length of the character, ranging from 4 to 8 seconds, which is a little bit longer than  
378 normal writing speed to adapt to the patient. The speed for each character and cohesion was constant, i.e.,  
379 the duration of each stroke or cohesion is proportional to their lengths.

380 The handwriting videos were artificially synthetic. Firstly, the sequences of two-dimensional coordinate  
381 for writing each character were extracted from standard font of that character using 'GetData Graph  
382 Digitizer' software. Secondly, each segment, defined as a straight line or an approximation of a straight line  
383 before sharp inflections, was labeled as stroke or cohesion and converted the coordinates into velocity  
384 sequences. The duration for each segment was proportional to the ratio of the segment length to the total  
385 length, and the velocity profiles in  $x$ - and  $y$ -direction were defined as:

$$386 \quad v_{x,y}(t) = \begin{cases} at, & 0 \leq t < T/2 \\ aT - at, & T/2 \leq t \leq T \end{cases}$$

387 Where  $T$  represents total duration of that segment, and  $a$  is the scaling factor to fit the duration of the  
388 segment. Lastly, the handwriting animations were created frame-by-frame according to the velocity profile  
389 above using MATLAB. The video had a black background, and there was a static dark trace of the entire  
390 character before the actual writing starts. The strokes are represented by light green lines with thick width  
391 over the static dark characters (Fig. 1B). The position and velocity data used for decoding were 5-point  
392 smoothed version of the actual traces (sampled at 20 Hz), which resembled a bell-shaped profile (Fig. 1C).

### 394 *Data collection sessions*

395 Neural data were recorded when the subject attempted to write various characters during 1-2 hours  
396 sessions on scheduled days. During the experimental sessions, the patient was seated in a wheelchair with  
397 hands resting on a table. A computer monitor was setup in front of the patient for task visualization. Two



398 cables were connected from the patient's head connectors to the NeuroPort data acquisition system  
399 (Blackrock Microsystem, USA), which recorded both neural signals and task timings (through serial port)  
400 simultaneously. The character dataset used in this study included:

401 (1) 8 directional paths from the center and 2 circular paths both clockwise and counterclockwise, which  
402 resembled a center-out task commonly used to examine directional tuning of neurons. Each direction was  
403 repeated 10 times in pseudorandom order (Fig. 2);

404 (2) 10-digit number from 0-9, which was repeated 10 times in pseudorandom order in each session. In  
405 some sessions, both center-out and digit writing were conducted to examine the tuning property for the same  
406 neuron (Fig. 2). In this case, only 5 repeats for each digit/direction were performed;

407 (3) 30 simple Chinese characters (usually 3-stroke) that were used to investigate the difference of  
408 tuning property between stroke and cohesion (Fig. 4). For each character, 2 blocks and 3 repeats/block were  
409 conducted per session.;

410 (4) 270 complex Chinese characters. 180 of them (average 7-stroke) were recorded with raw data and  
411 various signal features could be extracted and used for decoding analysis (Fig. 3). For each character, 2  
412 blocks and 3 repeats/block were conducted per session.;

413 (5) The same 30 Chinese characters were repeated in another separate 5 sessions to examine the  
414 stability of the decoded trajectories (Fig. 5). For each character, 2 blocks and 3 repeats/block were conducted  
415 per session.

#### 416 *Neural signal preprocessing*

417 Neural signals from each channel were amplified, filtered (0.3-7500 Hz) and digitized at a sample rate  
418 of 30 kHz using NeuroPort. Various signal features were then extracted, including:

419 (1) Single-unit activity (SUA), which was extracted online after further filtering (250-5000 Hz) with a  
420 threshold of -6.25 times root mean square (rms). Single units were isolated offline using Offline  
421 Sorter (Plexon, USA).

422 (2) Multi-unit activity (MUA), which was extracted offline from the further filtered data (250-5000  
423 Hz) using different threshold at -4.5 and -6.25 rms. No further spike sorting was applied.

424 (3) Local field potential (LFP), which was obtained by low-passing (below 500 Hz) of raw signal and  
425 down sampled to 2000 Hz. To reduce sporadic outliers, extremes exceeding  $\pm 3$  times the standard  
426 deviation from mean were clipped, followed by a third-order Butterworth lowpass filter. Then the  
427 mean powers for each frequency band (1-4, 3-10, 12-23, 27-38, 50-300 Hz) were calculated as  
428 signal features.

429 (4) Local motor potential (LMP), which was the moving averaged of LFP in non-overlapping 50 ms  
430 windows (27).

431 (5) Entire spiking activity (ESA), which was obtained by applying a first-order Butterworth high-pass  
432 filter (300 Hz) on raw signal, rectifying by taking the absolute value, first-order Butterworth low-  
433 pass filtering (12 Hz), and finally down sampling to 1 kHz (28).

434 (6) Spiking-band power (SBP), which was obtained by applying a second-order Butterworth bandpass  
435 filter (300-1000 Hz) to the raw signal, rectifying by taking its absolute value, and finally down  
436 sampled to 2 kHz (29).

437 (7) Continuous multiunit activity (cMUA), which was obtained by applying third-order Butterworth  
438 bandpass filtering (300-6000 Hz) to raw signal, squared, low-pass filtering using a third-order  
439 Butterworth filter (100 Hz), clipping negative values, square rooted, and finally down sampled to 1  
440 kHz (30). We have found cMUA had high correlation coefficient (above 0.87, Fig. S4B) and  
441 similar decoding results with ESA and was not used for further analysis.

442 To identify the actual timing of imaginary handwriting after animation start, we performed principal  
443 component analysis (PCA) and found a significant change of neural activity in PC1 and PC2 occurred at  
444 around 300 ms after the cue (Fig. S4C). Subsequent decoding analysis confirmed that a delay of 300 ms  
445 achieved the best results. Therefore, we aligned the writing kinematics with the 300-ms-shifted neural in all  
446 following analysis. The bin size to average the neural activities were also tested in a classification decoding  
447 task, ranging from 50 to 400 ms, and confirming that a bin size of around 200 ms yielded the best results  
448 (Fig. 2F). Thus, all the neural signal features above were binned with overlapping 200 ms window and  
449 shifted 300 ms to align with handwriting kinematics.

#### 450 *Directional tuning and visualization*

451 During center-out task, the averaged firing rate in each direction was calculated and depicted as a radar  
452 plot for each neuron (Fig. 2B). The preferred direction (PD) was determined as the direction with highest  
453 firing rate. During digits writing task, each spike during writing was plotted back onto the trajectory (with  
454 little position jet depending on the width of the stroke) to illustrate where, during the writing, a spike fired  
455 (Fig. 2D). During simple Chinese character writing, the tuning curve (i.e., firing rate vs. writing direction)  
456

was plotted separately for stroke and cohesion (Fig. 4B). As a comparison, the strokes were randomly assigned into two equal groups and the tuning curves for each group were constructed separately (Fig. 4C).

We used t-distributed stochastic neighbor embedding (t-SNE) to reduce the dimensionality of the trials of neural activity for visualization (Fig. 2E). The neural activity for writing digits was compiled into a matrix with dimension  $T \times UB$ , where  $T$  is the number of trials,  $U$  is the number of units and  $B$  is the number of bins in each trial. We applied t-SNE to these matrices using *tsne* function in MATLAB with default parameters.

#### Classification and fitting models and metrics

To classify the digits (10 in each session with 10 repeats each) or characters (30 in each session with 3 repeats each) identities, we employed support vector machine (SVM) classifier in *libsvm* library with polynomial kernel. The classifier was cross-validated with leaving-one-trial-out scheme.

To fit the trajectory of the imagined handwriting movement from the neural signal features, we utilized both Kalman Filter (KF) and long short-term memory (LSTM) as decoder (28). The KF uses linear system state equation and the input-output data observed to estimate the system's state optimally. The KF employs a recursive approach for state prediction and state updates as follows:

$$\begin{aligned}\hat{x}_k^- &= A\hat{x}_{k-1}^- + Bu_k \\ P_k^- &= AP_{k-1}A^T + Q \\ K_k &= P_k^-H^T(HP_k^-H^T + R)^{-1} \\ \hat{x}_k &= \hat{x}_k^- + K_k(z_k - H\hat{x}_k^-) \\ P_k &= (I - K_kH)P_k^-\end{aligned}$$

where  $\hat{x}_k^-$  is the predicted state value,  $\hat{x}_k$  is the optimal estimate of the state,  $A$  is the state transition matrix,  $B$  is the control input matrix,  $H$  is the state observation matrix,  $Q$  and  $R$  represent the covariances, which respectively characterize the deviations of the state values and observation values.

The LSTM is a type of recurrent neural network (RNN) designed specifically to solve the issue of long-term dependencies in traditional RNNs. The core of LSTM is the cell state, which serves to stably preserve long-term memory in the model. LSTM utilizes gate mechanisms to control the removal or addition of information to the cell state. The forget gate determines which information should be discarded from the cell state, the input gate determines which new information should be added to the cell state, and the output gate determines the features of the cell state to be outputted. The description is as follows:

$$\begin{aligned}f_t &= \sigma(W_f x_t + U_f h_{t-1} + b_f) \\ i_t &= \sigma(W_i x_t + U_i h_{t-1} + b_i) \\ \tilde{c}_t &= \tanh(W_c x_t + U_c h_{t-1} + b_c) \\ o_t &= \sigma(W_o x_t + U_o h_{t-1} + b_o) \\ c_t &= f_t \odot c_{t-1} + i_t \odot \tilde{c}_t \\ h_t &= o_t \odot \tanh(c_t)\end{aligned}$$

Where  $x$  represents the input,  $h$  represents the output,  $f$  represents the forget gate,  $i$  represents the input gate,  $o$  represents the output gate,  $c$  represents the cell memory. The symbols  $\sigma$  and  $\odot$  represent the sigmoid activation function and element-wise multiplication operator. The number of units in the LSTM was 512 and the network was trained with batch size of 1, dropout rate of 0 and learning rate of 0.001.

We also tried bidirectional LSTM (Bi-LSTM) for trajectory fitting (10), which, contrasting with LSTM, considers both historical and future information to determine the output. The structure of Bi-LSTM consists of two LSTM units, one processing the input sequence from the past to the future, and the other processing it from the future to the past. Through this approach, Bi-LSTM can achieve a more comprehensive understanding of the sequence. However, this approach was not causal and thus could not be used for online applications.

The fitting models were cross-validated using a leaving-one-character-out method, in which, all the repeats for the same character to be tested was excluded for training the model. Both velocity and position of the handwriting were used to decode the trajectory of characters. For velocity model, an additional step that integrating velocity along the path was calculated to reconstruct the position, i.e., trajectory. Finally, we used Mean Squared Error (MSE) and Pearson's Correlation Coefficient (CC) as evaluation metrics for decoding performance and paired Wilcoxon signed-rank tests to assess statistical differences in decoding performance between different features and decoding methods.

#### Dual-model and similarity metrics

The trajectory fitting model above were trained with mixed strokes and cohesions (single-model). We also trained stroke- and cohesion-model with exclusively the stroke and cohesion data, respectively, and tested in simple Chinese characters (dual-model, Fig. 4). To quantify the quality of reconstruction for the single- and dual-model, two similarity metrics were defined for stroke and cohesion, respectively. The

517 cohesions were always straight lines and the similarity was defined as weighted sum of angular and length  
518 similarity:

$$S_{cohesion} = \sum_{i=1}^N w \cdot \frac{1 + \cos \Delta\theta_i}{2} + (1 - w) \cdot \left( 2 - \frac{2}{1 + e^{-\Delta L_i/L_i}} \right)$$

520 where  $w$  is the weight and set to 0.6 in this study to emphasize the importance of angle of cohesion  
521 which is important for character reconstruction.  $\Delta L_i$  and  $\Delta\theta_i$  is the length and angle difference for  $i$ -th  
522 cohesion out of the total number of cohesions  $N$ . Similarity for strokes was defined as the weighted sum of  
523 pair-wise distance and the correlation between the trajectories:

$$S_{stroke} = \sum_{i=1}^N w \cdot \left( 2 - \frac{2}{1 + e^{-rms(\Delta d_j)/L_i}} \right) + (1 - w) \cdot CC_{x,y}$$

524 where the weight  $w$  was set to 0.6 to emphasis the pair-wise distance  $\Delta d_j$  between decoded trajectory  
525 and prompted trajectory.

526 To classify the strokes and cohesions, another LSTM was trained with similar structure and parameters  
527 above. A cascading model with LSTM classifier and dual-model for fitting was constructed to decode the  
528 velocity bin-by-bin and reconstruct the trajectories by integration.

### 531 *Recognition of handwriting trajectories*

532 Decoded handwriting trajectories were recognized as text in two ways. Firstly, the trajectory for each  
533 character was fed into an online generic handwriting recognition software through their APIs (teshuzi.com).  
534 The first Chinese character output by the algorithm, which has the highest similarity score, was selected as  
535 the recognition outcome. Secondly, we recognized the decoded trajectories by matching them against a  
536 database of velocity profiles from standard characters. To accomplish this, we extracted trajectories for up to  
537 1000 commonly used characters (using methods above) and converted them into their corresponding  
538 velocity profiles. The 180 characters tested in this study were part of this library, but the velocity profiles in  
539 the library were not identical with the velocity prompted to the subject (due to different sampling). Dynamic  
540 Time Warping (DTW) and correlation coefficient (CC) were employed to quantify the similarity between  
541 the decoded velocity and velocity profiles in the library. DTW permits temporal stretch and delay, thereby  
542 enabling a more precise capture of the inter-sequence similarity. However, the computation load was high  
543 for DTW and the fastDTW algorithm was employed to compute the DTW distances. The character with the  
544 highest similarity score, as determined by DTW or CC, was selected as the final recognition result.

## 546 **References**

- 547 1. L. R. Hochberg *et al.*, Reach and grasp by people with tetraplegia using a neurally  
548 controlled robotic arm. *Nature* **485**, 372-375 (2012).
- 549 2. J. L. Collinger *et al.*, High-performance neuroprosthetic control by an individual with  
550 tetraplegia. *The Lancet* **381**, 557-564 (2013).
- 551 3. C. Pandarinath *et al.*, High performance communication by people with paralysis using an  
552 intracortical brain-computer interface. *Elife* **6**, (2017).
- 553 4. T. Aflalo *et al.*, Decoding motor imagery from the posterior parietal cortex of a tetraplegic  
554 human. *Science* **348**, 906-910 (2015).
- 555 5. C. E. Bouton *et al.*, Restoring cortical control of functional movement in a human with  
556 quadriplegia. *Nature* **533**, 247-250 (2016).
- 557 6. S. L. Metzger *et al.*, A high-performance neuroprosthesis for speech decoding and avatar  
558 control. *Nature* **620**, 1037-1046 (2023).
- 559 7. F. R. Willett *et al.*, A high-performance speech neuroprosthesis. *Nature* **620**, 1031-1036  
560 (2023).
- 561 8. H. Lorach *et al.*, Walking naturally after spinal cord injury using a brain–spine interface.  
562 *Nature* **618**, 126-133 (2023).
- 563 9. U. Chaudhary, N. Birbaumer, A. Ramos-Murguialday, Brain–computer interfaces for  
564 communication and rehabilitation. *Nature Reviews Neurology* **12**, 513-525 (2016).
- 565 10. F. R. Willett, D. T. Avansino, L. R. Hochberg, J. M. Henderson, K. V. Shenoy, High-  
566 performance brain-to-text communication via handwriting. *Nature* **593**, 249-254 (2021).

- 567 11. A. Tripathi, A. Gupta, P. P. A, S. P. Muthukrishnan, L. Kumar, NeuroAiR: Deep Learning  
568 Framework for Airwriting Recognition From Scalp-Recorded Neural Signals. *IEEE*  
569 *Transactions on Instrumentation and Measurement* **73**, 1-13 (2024).
- 570 12. L. Pei, G. Ouyang, Online recognition of handwritten characters from scalp-recorded brain  
571 activities during handwriting. *Journal of Neural Engineering* **18**, 046070 (2021).
- 572 13. S. Palmis, J. Danna, J.-L. Velay, M. Longcamp, Motor control of handwriting in the  
573 developing brain: A review. *Cognitive Neuropsychology* **34**, 187-204 (2017).
- 574 14. S. Planton, M. Jucla, F.-E. Roux, J.-F. Démonet, The “handwriting brain”: A meta-  
575 analysis of neuroimaging studies of motor versus orthographic processes. *Cortex* **49**,  
576 2772-2787 (2013).
- 577 15. A. P. Georgopoulos, J. F. Kalaska, R. Caminiti, J. T. Massey, On the relations between the  
578 direction of two-dimensional arm movements and cell discharge in primate motor cortex.  
579 *J Neurosci* **2**, 1527-1537 (1982).
- 580 16. P. Nuyujukian, J. C. Kao, S. I. Ryu, K. V. Shenoy, A Non-Human Primate Brain-  
581 Computer Typing Interface. *Proc IEEE Inst Electr Electron Eng* **105**, 66-72 (2017).
- 582 17. M. Velliste, S. Perel, M. C. Spalding, A. S. Whitford, A. B. Schwartz, Cortical control of a  
583 prosthetic arm for self-feeding. *Nature* **453**, 1098-1101 (2008).
- 584 18. A. B. Schwartz, D. W. Moran, Motor Cortical Activity During Drawing Movements:  
585 Population Representation During Lemniscate Tracing. *Journal of Neurophysiology* **82**,  
586 2705-2718 (1999).
- 587 19. P. T. Sadtler, S. I. Ryu, E. C. Tyler-Kabara, B. M. Yu, A. P. Batista, Brain-computer  
588 interface control along instructed paths. *J Neural Eng* **12**, 016015 (2015).
- 589 20. A. J. W. M. Thomassen, G. P. van Galen, in *Advances in Psychology*, J. J. Summers, Ed.  
590 (North-Holland, 1992), vol. 84, pp. 113-144.
- 591 21. M. Thomas, A. Lenka, P. Kumar Pal, Handwriting Analysis in Parkinson's Disease:  
592 Current Status and Future Directions. *Movement Disorders Clinical Practice* **4**, 806-818  
593 (2017).
- 594 22. M. M. Churchland *et al.*, Neural population dynamics during reaching. *Nature* **487**, 51-56  
595 (2012).
- 596 23. J. Memon, M. Sami, R. A. Khan, M. Uddin, Handwritten optical character recognition  
597 (OCR): A comprehensive systematic literature review (SLR). *IEEE access* **8**, 142642-  
598 142668 (2020).
- 599 24. R. Plamondon, S. N. Srihari, Online and off-line handwriting recognition: a  
600 comprehensive survey. *IEEE Transactions on pattern analysis and machine intelligence*  
601 **22**, 63-84 (2000).
- 602 25. M. Yin, D. A. Borton, J. Aceros, W. R. Patterson, A. V. Nurmikko, A 100-Channel  
603 Hermetically Sealed Implantable Device for Chronic Wireless Neurosensing Applications.  
604 *IEEE transactions on biomedical circuits and systems* **7**, 115-128 (2013).
- 605 26. L. Drew, Decoding the business of brain–computer interfaces. *Nature Electronics* **6**, 90-95  
606 (2023).
- 607 27. S. D. Stavisky, J. C. Kao, P. Nuyujukian, S. I. Ryu, K. V. Shenoy, A high performing  
608 brain-machine interface driven by low-frequency local field potentials alone and together  
609 with spikes. *J Neural Eng* **12**, 036009 (2015).
- 610 28. N. Ahmadi, T. G. Constandinou, C. S. Bouganis, Robust and accurate decoding of hand  
611 kinematics from entire spiking activity using deep learning. *J Neural Eng* **18**, (2021).
- 612 29. S. R. Nason *et al.*, A low-power band of neuronal spiking activity dominated by local  
613 single units improves the performance of brain-machine interfaces. *Nature biomedical*  
614 *engineering* **4**, 973-983 (2020).
- 615 30. E. Stark, M. Abeles, Predicting movement from multiunit activity. *J Neurosci* **27**, 8387-  
616 8394 (2007).

617  
618  
619  
620  
621  
622  
623  
624  
625  
626  
627  
628  
629  
630  
631  
632  
633  
634  
635  
636

## Acknowledgments

This work was supported by STI 2030—Major Projects (2021ZD0200404), National Natural Science Foundation of China (62336007), Pioneer R&D Program of Zhejiang (2024C03001), the Starry Night Science Fund of Zhejiang University Shanghai Institute for Advanced Study (SN-ZJU-SIAS-002), and the Fundamental Research Funds for the Central Universities (2023ZFH01-01, 2024ZFH01-01). The authors thank Mr. Xiang Li for software development, Prof. Schwartz for implantation surgery.

### Author contributions:

Conceptualization: YH, YW; Methodology: YH, GX, KX, Jzhu, YW; Investigation: YH, GX, XY, ZW, XX, JZhu, YW; Visualization: YH, GX, XY, ZW, XX; Supervision: YH, JZhang, YW; Writing—original draft: YH, GX; Writing—review & editing: YH, KX, JZhang, YW.

**Competing interests:** Authors declare that they have no competing interests.

**Data and materials availability:** All data in the main text or the supplementary materials are available upon request.

637 **Figures and Tables**

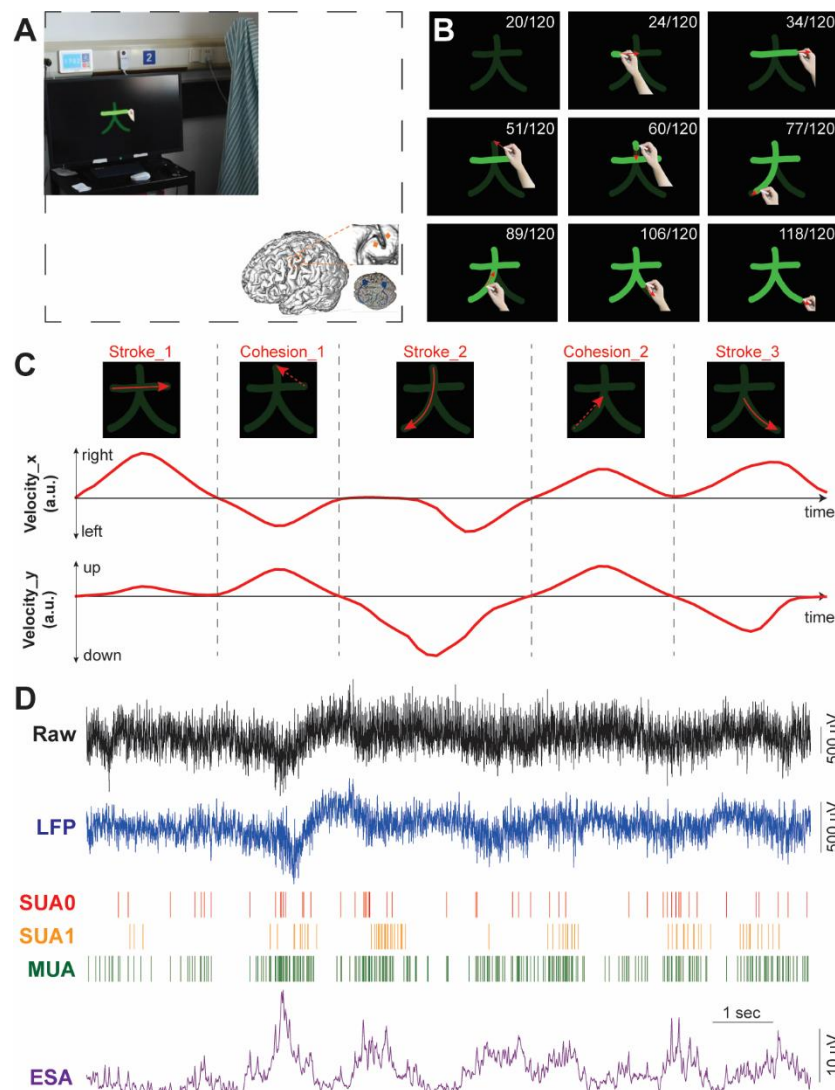

638 **Fig. 1. Experimental setup and neural signal recording.** (A) The subject with recording  
639 cables connected was imaging handwriting with his right hand following the  
640 animation showed on the screen. Inset: illustration of implantation position for the  
641 two Utah array (orange) and two connectors (blue) in the left hemisphere. (B)  
642 Example frames of the animation video writing a Chinese character ‘大’ (big). The  
643 red arrow indicates the moving direction (not shown in the experiment). The  
644 number in the upper right indicates current frame/total frame number (not shown  
645 in the experiment). (C) Velocity profile (red lines) in x and y directions for the  
646 character ‘大’. The dash lines separate the three strokes and two cohesions, which  
647 are represented by red solid and dash arrows, respectively. (D) Example of neural  
648 signals when handwriting a character, including raw signal (30k sampling, 0.3-  
649 7500 Hz) and other processed signal features, like LFP, SUA, MUA and ESA.  
650

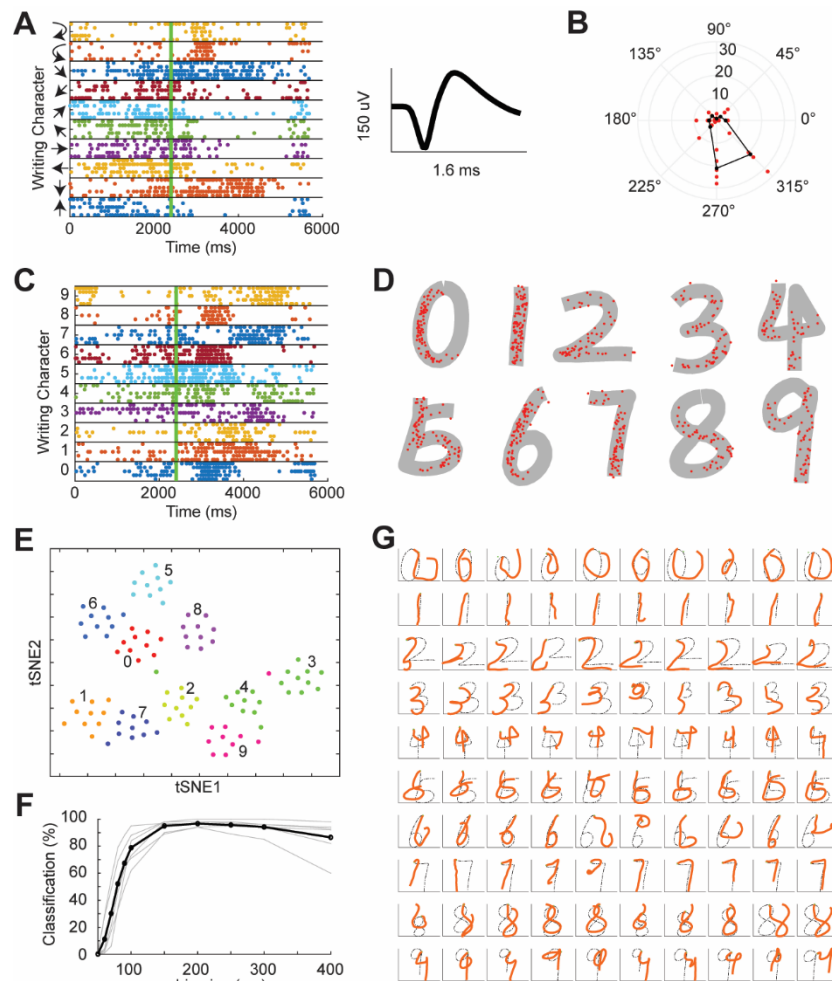

651  
 652  
 653 **Fig. 2. Neuronal tuning and decoding of digit-number handwriting.** (A) Raster plot of  
 654 one example neuron (average waveform showed in the right panel) when the  
 655 subject handwriting straight lines in 8 directions, clockwise and anti-clockwise  
 656 circles. Five trials were repeated in each condition. The green line indicates the  
 657 start of handwriting animation. (B) Radar plot of the tuning curve for the example  
 658 neuron showed in (A). Each red dot represents one trial and the black line indicates  
 659 the average firing rate. (C) Raster plot of the same neuron as in (A) but for  
 660 handwriting of the ten-digit numbers (0~9). (D) The firing of the example neuron  
 661 during handwriting of digit numbers was mapped onto the trajectories of the  
 662 numbers. Each red dot represents the neuron fired once and five trials were  
 663 overlapped. (E) tSNE plot of the dimension-reduced neural activity of handwriting  
 664 the ten-digit numbers. (F) Classification accuracy of ten-digit numbers as a  
 665 function of bin size for single unit activity (SUA). The curve peaked at 97% when  
 666 the bin size is 200 ms. (G) Trajectory decoding (red line) of digit number  
 667 handwritings in one example session. Each digit was repeated 10 times.

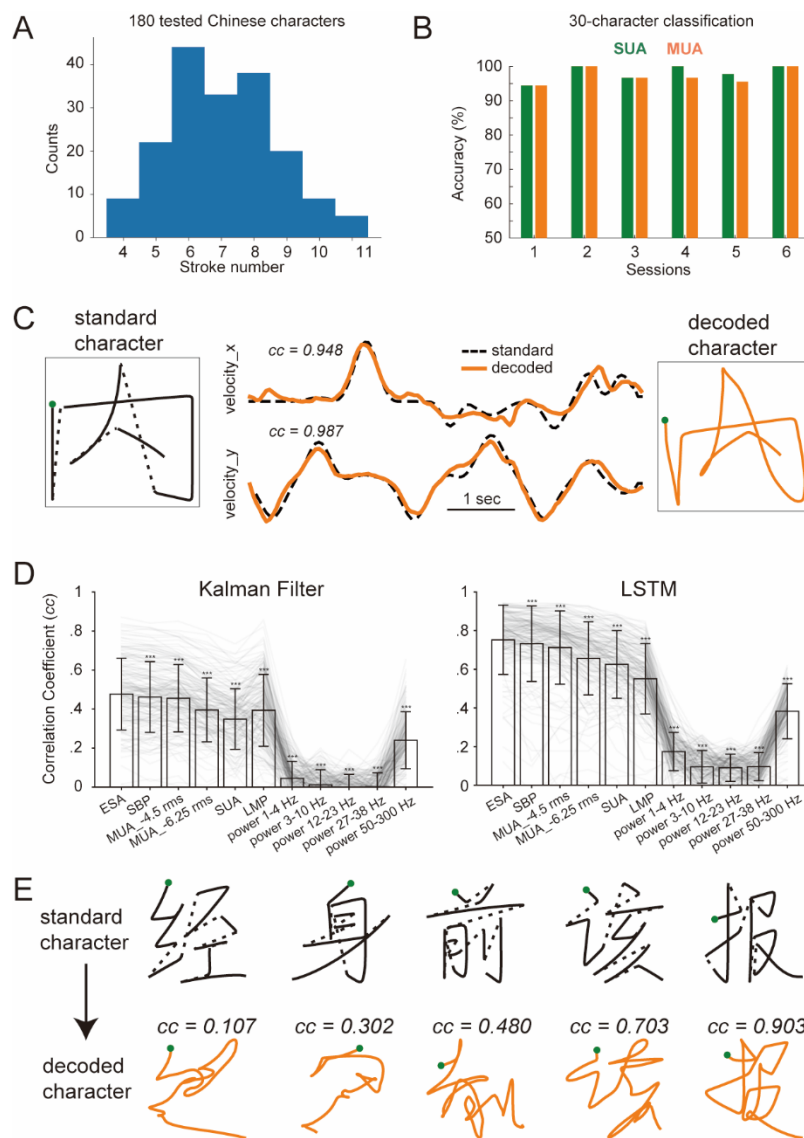

**Fig. 3. Trajectory fitting of complex Chinese characters.** (A) Distribution of the stroke number of 180 Chinese characters tested with various neural signals. (B) Classification accuracy for the 6 sessions (30 characters per session) with both SUA and MUA. (C) Example of a standard Chinese character ‘内’ (solid for strokes and dash line for cohesions, left panel) and the decoded trajectory (orange, right panel). The corresponding velocity profiles in x and y directions were showed in the middle panel. Green dots indicate the start of the handwriting. (D) The fitting correlation coefficients (CC) of the 180 characters for Kalman Filter (left panel) and LSTM (right panel) decoder with various kinds of neural signals. See text for the abbreviation. Asterisk (\*\*\*) indicates significant difference between ESA and other signals (paired signed-rank test,  $p < 0.001$ ). (E) Five more fitting examples (‘经’, ‘身’, ‘前’, ‘该’, ‘报’) with fitting CC ranging from 0.1 to 0.9.

668  
669  
670  
671  
672  
673  
674  
675  
676  
677  
678  
679  
680  
681



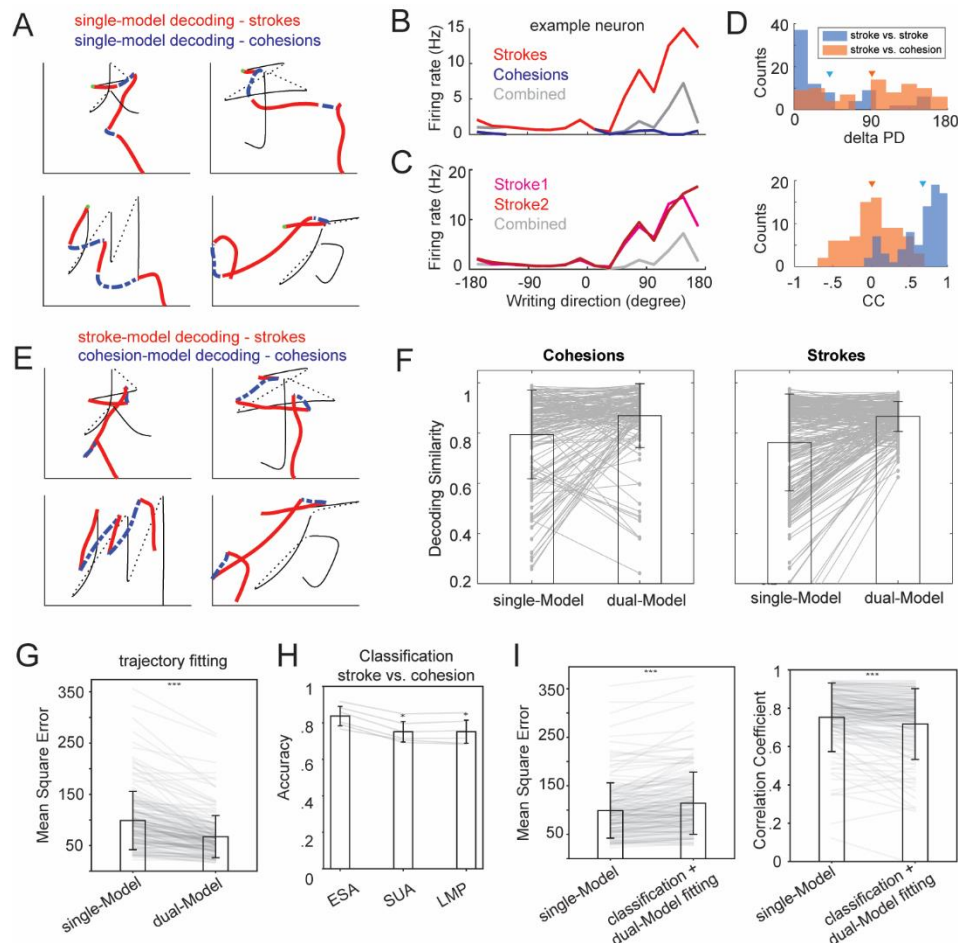

**Fig. 4. Trajectory fitting by stroke and cohesion dual-model.** (A) Illustration of four example characters (‘大’, ‘于’, ‘川’, ‘万’) decoded by a single-model trained with both strokes and cohesions. The thin solid and black traces indicate strokes and cohesions of prompted characters, respectively. Thick red and blue line represents decoded trajectories for strokes and cohesions, respectively. (B) Tuning curve (i.e., firing rate as a function of writing direction) of two example units for strokes (red), cohesions (blue) and combined (gray). (C) Same as (B) but for stroke half 1 vs. stroke half 2. (D) The histogram of differences between preferred directions (delta PD, upper panel) and correlation coefficient of tuning curves (CC, lower panel) for strokes vs. strokes (blue) and strokes vs. cohesions (orange). Downward triangles indicate means of the distribution. (E) Same as (A) but the strokes and cohesions were separately decoded using stroke and cohesion models (i.e., dual-model), respectively. (F) Comparison of decoding similarity of cohesions (left panel) and strokes (right panel) using single-model and dual-model. (G) Comparison of MSE for the 180 decoded characters between single-model and dual-model. Each line represents one character. Asterisk (\*\*\*) indicates significant difference between groups (paired signed-rank test,  $p < 0.001$ ). (H) Averaged classification accuracy for stroke vs. cohesion using ESA, SUA and LMP signals. (I) Comparison of mean square error (MSE, left) and correlation coefficient (CC, right) for the 180 decoded characters between single-model vs. classification and dual-model cascade decoding. Each line represents one character and error bar illustrates the mean and standard deviation. Asterisk (\*\*\*) indicates significant difference between groups (paired signed-rank test,  $p < 0.001$ ).

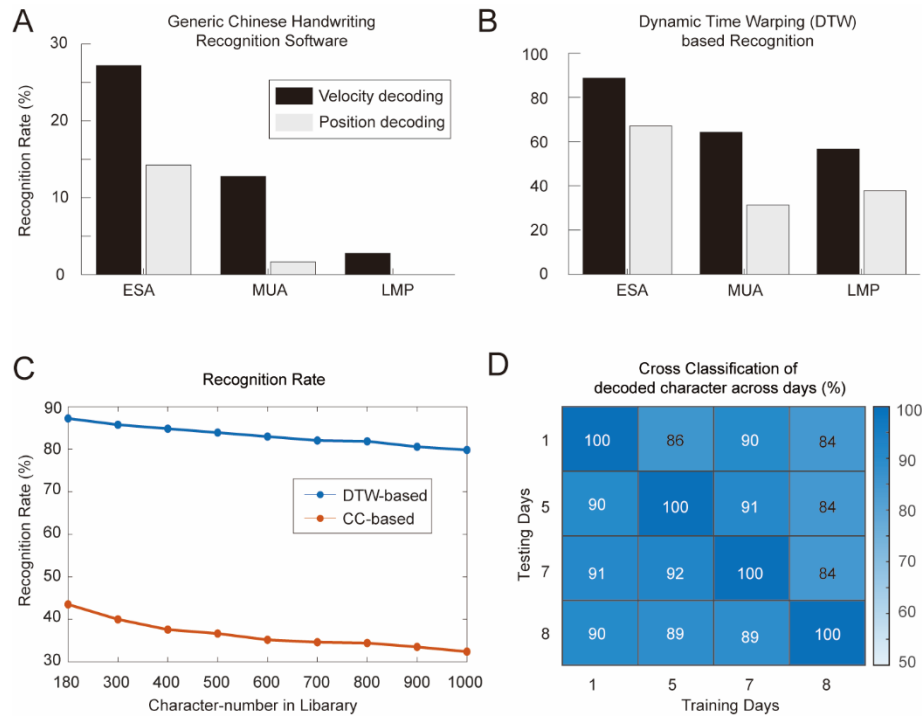

**Fig. 5. Recognition of decoded handwriting trajectory.** (A) Recognition rate of the 180 decoded characters using a generic handwriting character recognition API (from teshuzi.com). The decoding results for LMP, MUA, and ESA were illustrated. Decoding scheme for both velocity (black bar) and position (gray bar) was tested. (B) Same as (a) but for dynamic time warping (DTW) based recognition method which calculates similarity between the decoded trajectories and the standard Chinese character trajectories (180-character in library). (C) DTW- and CC-based recognition rate as a function of character number in the library. (D) The same set of 30-character was tested repeatedly in four days. Classification models were trained based on the decoded trajectories in each day and tested in all other days. The cross-day classification rates were all above 0.84.

707  
708  
709  
710  
711  
712  
713  
714  
715  
716  
717  
718  
719

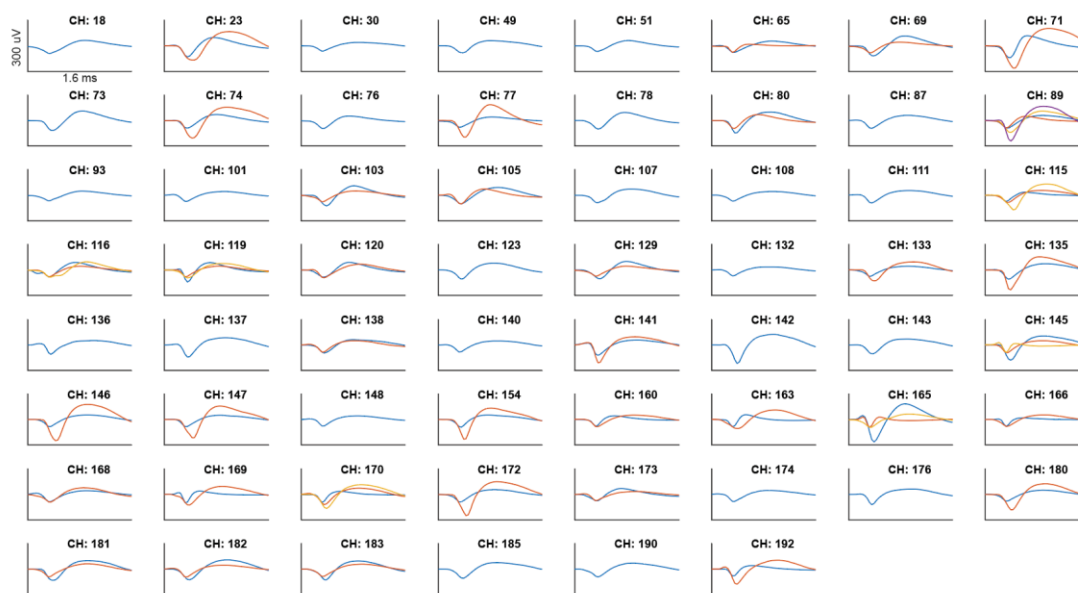

**Supplementary Fig. 1. Sorted single unit waveforms in one example session.** A total of 107 units were sorted from 62/192 channels in two Utah arrays.

720  
721  
722  
723

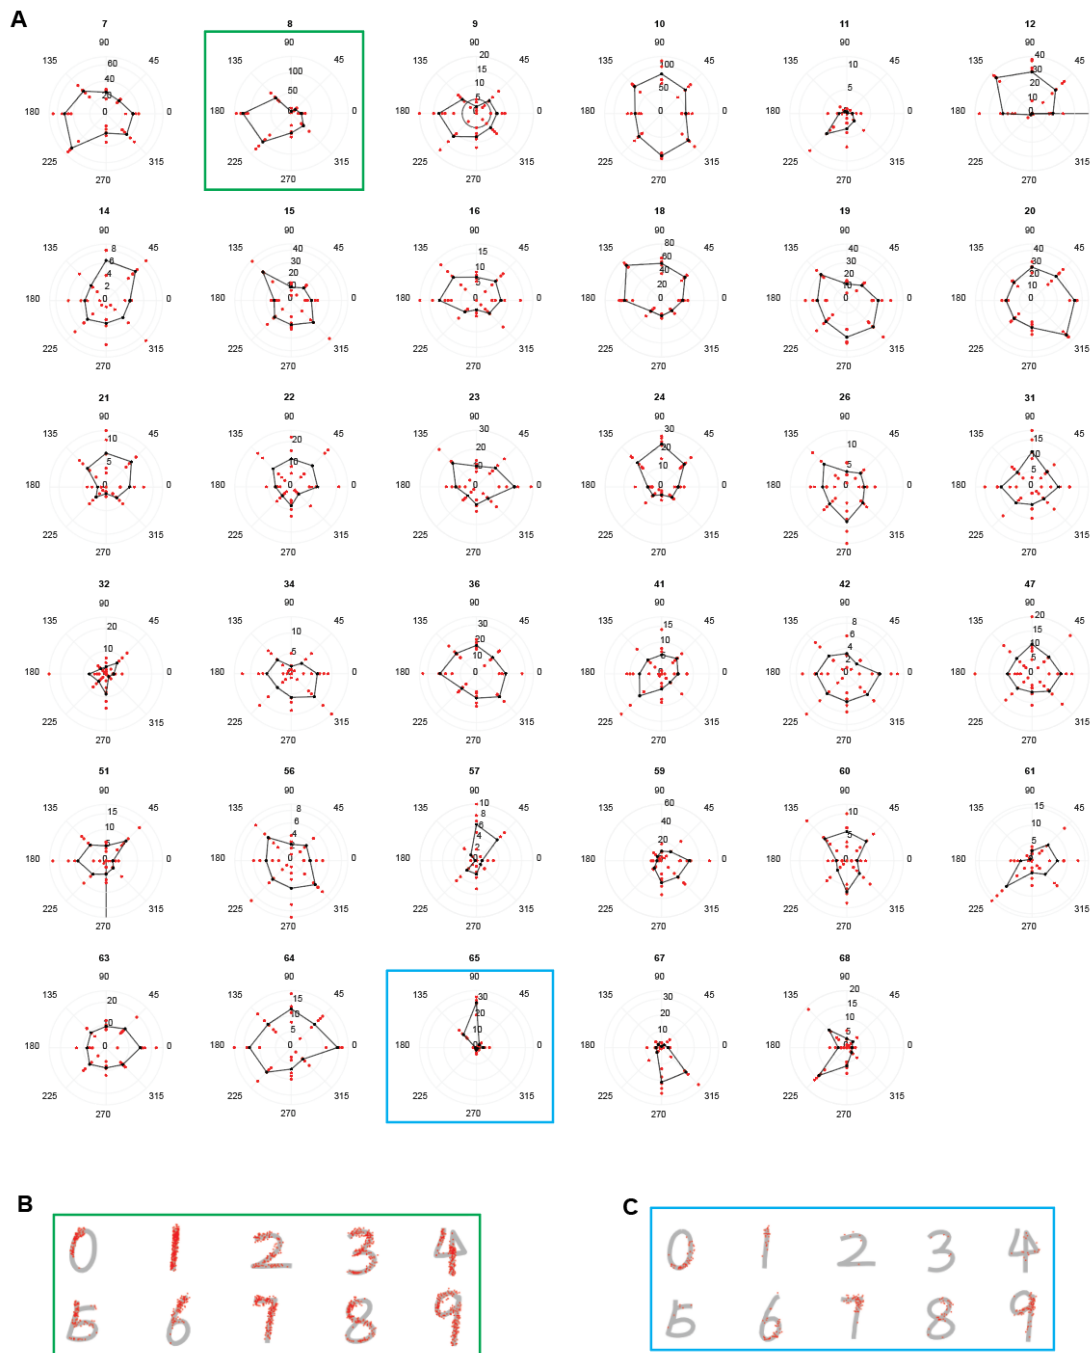

**Supplementary Fig. 2. Tuning property of single neurons.** (A) Radar plot of the tuning curves for all the neurons with mean firing rate  $>5$  Hz in one example session handwriting of straight lines in 8 directions. Each red dot represents one trial and the black line indicates the average firing rate. (B) and (C) The firing of the two example neurons showed in (A) (green and blue box) during handwriting of digit numbers was mapped onto the trajectories of the numbers. Each red dot represents the neuron fired once and five trials were overlapped.

724  
725  
726  
727  
728  
729  
730  
731  
732  
733

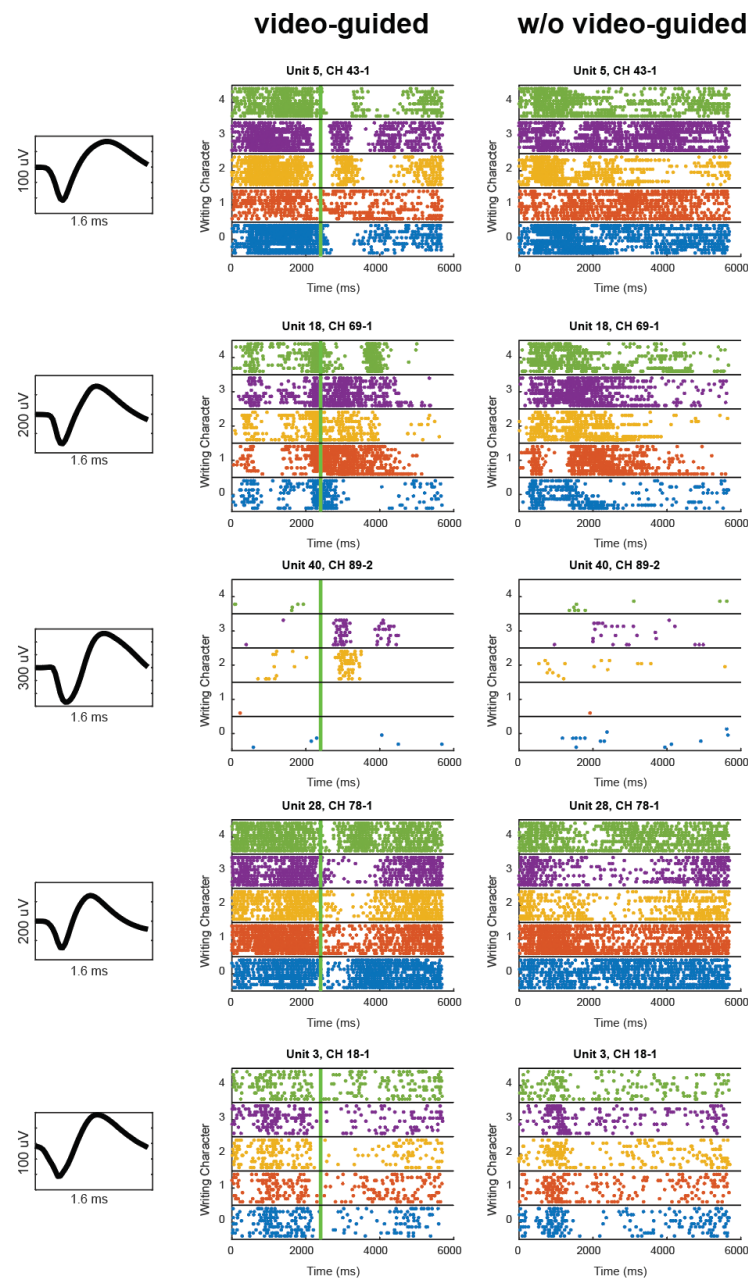

734  
735 **Supplementary Fig. 3. Comparison of firing pattern when handwriting with or**  
736 **without video guidance.** Raster plot of 5 example neurons (average waveform  
737 showed in the left panel) when the subject handwriting digit number 0~4. Ten  
738 trials were repeated for each number. The green line indicates the start of  
739 handwriting animation video.  
740

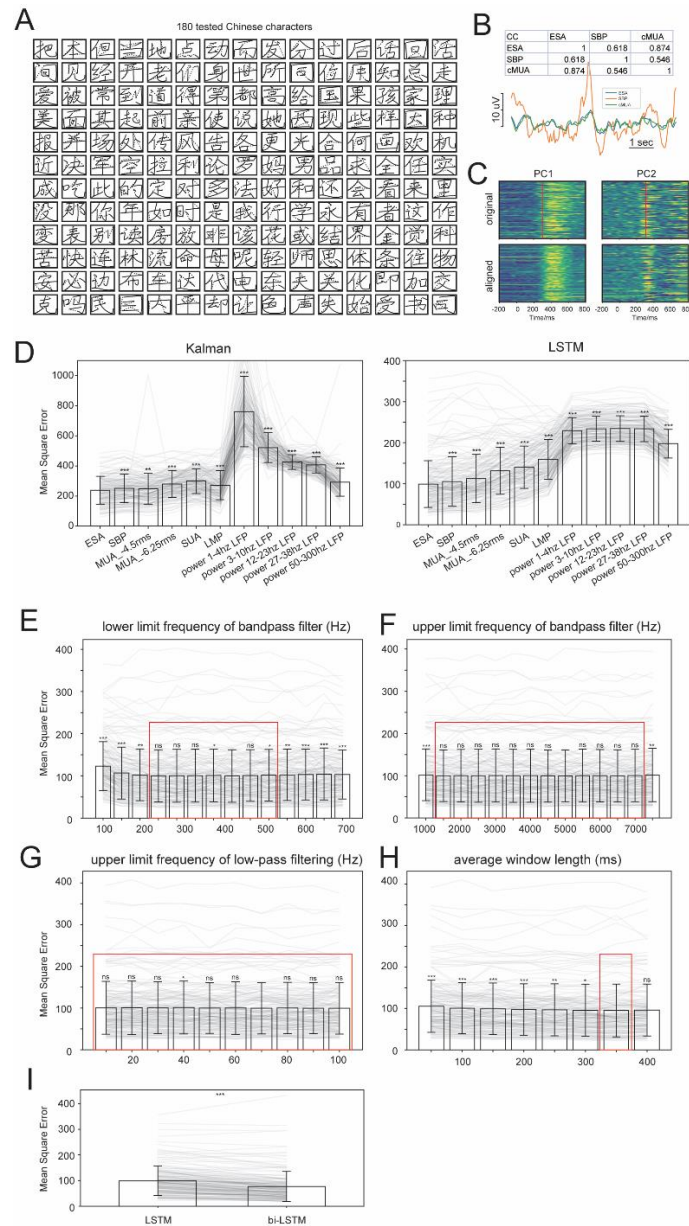

**Supplementary Figure 4. Chinese character handwriting trajectory decoding. (A)**

180 example Chinese characters tested with various types neural signals. **(B)** example traces for ESA, SBP and cMUA. Inset shows the cross-correlation coefficient. **(C)** The population neural activity was reduced by PCA and PC1 and PC2 from all trials are plotted in the upper panel. The red line indicates the change of neural activity pattern which is located around 300 ms after start of the animation video. The lower panel shows the same PC1 and PC2 but aligned around at the 300 ms. **(D)** The fitting mean square error (MSE) of the 180 characters for Kalman Filter (left panel) and LSTM (right panel) decoder with various kinds of neural signals. See text for the abbreviation. Asterisk (\*\*\*) indicates significant difference between ESA and other signals (paired signed-rank test,  $p < 0.001$ ). **(E-H)** Optimization of parameters for ESA feature extraction, including lower cut frequency of bandpass filter (E), upper limit frequency of bandpass filter (F), upper limit frequency of lowpass filter (G) and window size (H). The red box indicates the optimal range. **(I)** The fitting MSE of bi-LSTM is significantly lower than LSTM (\*\*\*, paired signed-rank test,  $p < 0.001$ ).

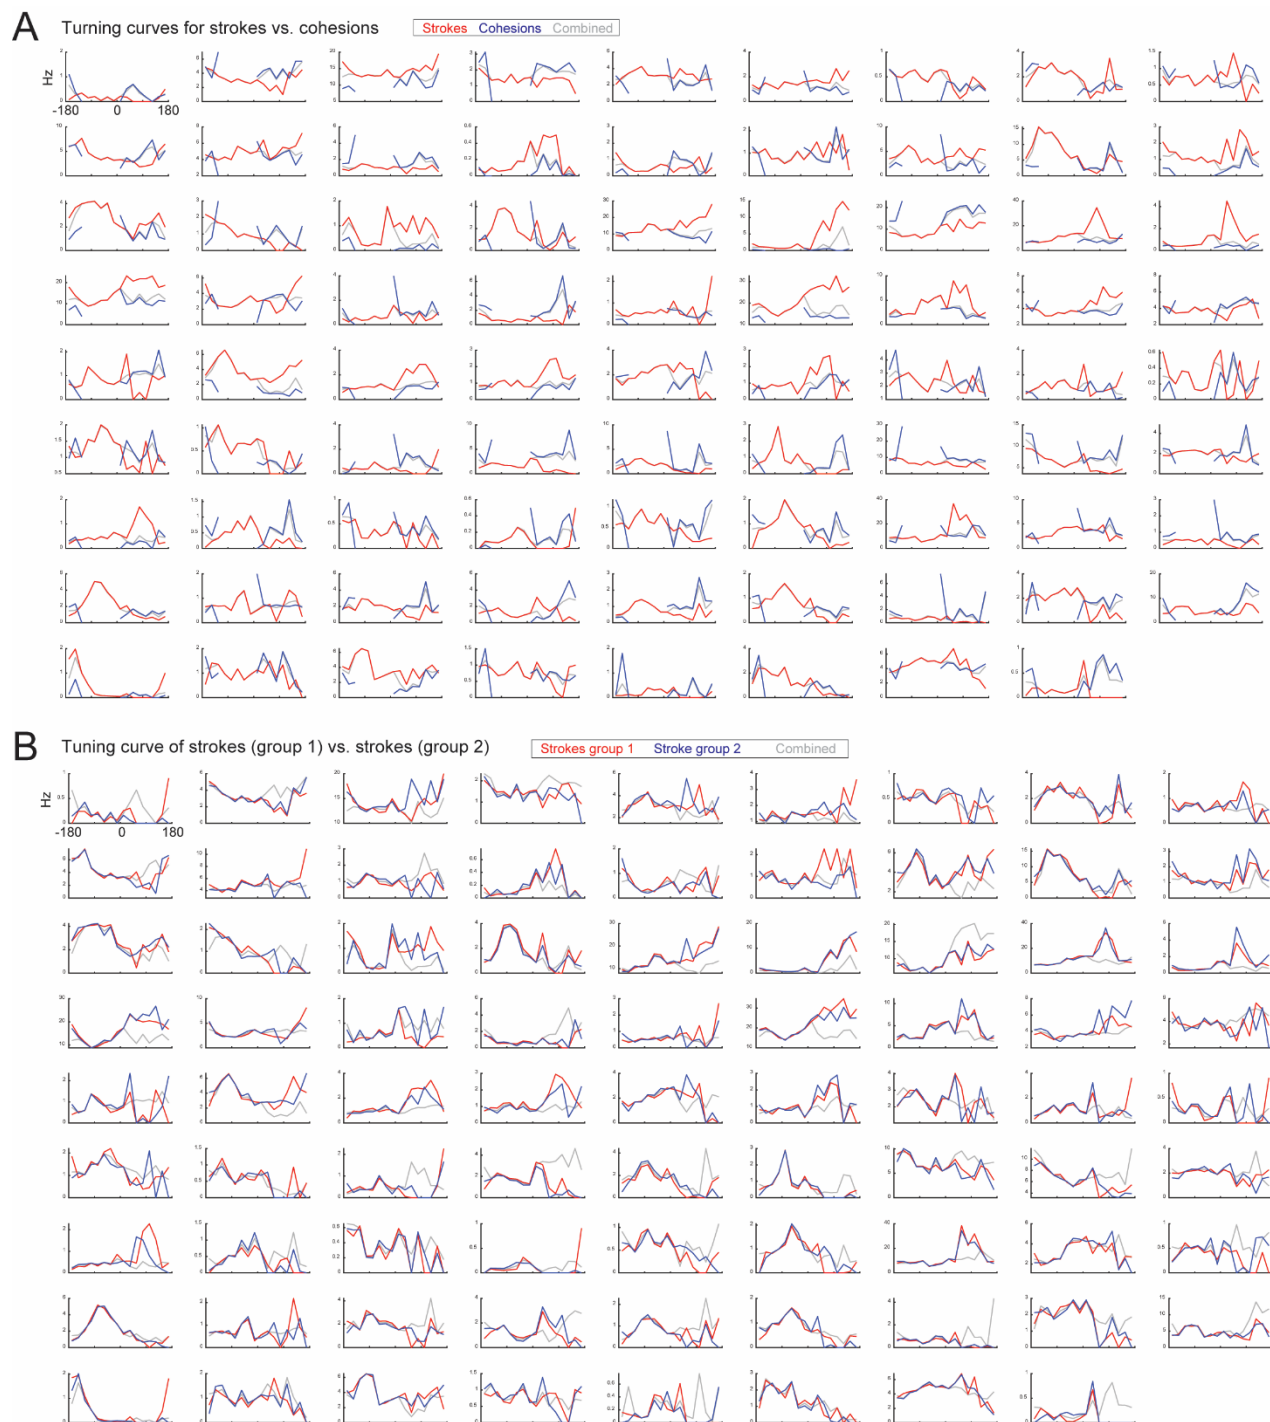

**Supplementary Figure 5. Tuning curves of stroke and cohesion. (A)** Tuning curves of all the neurons in one example session for strokes (red), cohesions (blue) and combined (gray). **(B)** Tuning curves of all the neurons in the same session as in (A) for randomly assigned stroke group 1 (red) and group 2 (blue) and combined (gray).

759  
760  
761  
762  
763  
764  
765  
766
